# Supplementary material for: Fabrication of flexible polymer–GaN core–shell nanofibers by the combination of electrospinning and hollow cathode plasma-assisted atomic layer deposition
Source: Royal Society of Chemistry journal article supplement (doi:10.1039/c5tc00343a), 2015-01-01
Supplement: c5tc00343a1.pdf [file c5tc00343a1.pdf]

## Electronic Supplementary Information

### Fabrication of flexible polymer-GaN core-shell nanofibers by the combination of electrospinning and hollow cathode plasma-assisted atomic layer deposition

Cagla Ozgit-Akgun,<sup>\*ab</sup> Fatma Kayaci,<sup>ab</sup> Sesha Vempati,<sup>a</sup> Ali Haider,<sup>ab</sup> Asli Celebioglu,<sup>ab</sup>  
Eda Goldenberg,<sup>a</sup> Seda Kizir,<sup>ab</sup> Tamer Uyar<sup>ab</sup> and Necmi Biyikli<sup>\*ab</sup>

**Table S1.** Tensile test results of pristine nylon 6,6 and nylon-GaN core-shell nanofiber mats.

| Sample                             | Nylon 6,6 nanofiber mat | Nylon 6,6-GaN core-shell nanofiber mat |
|------------------------------------|-------------------------|----------------------------------------|
| Young Modulus                      | 265.33±26.46 MPa        | 16.11±1.59 MPa                         |
| Ultimate Stress (Tensile Strength) | 23.08±6.73 MPa          | 1.83±0.17 MPa                          |
| Elongation at Break                | 21.63±5.77%             | 0.61±0.12%                             |

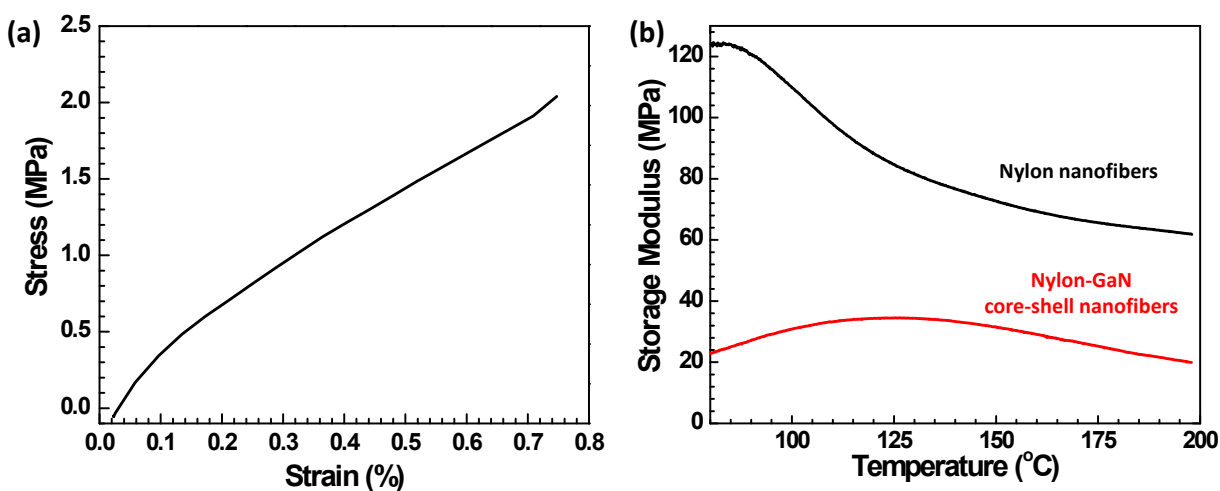

**Figure S1.** DMA results: (a) stress vs. strain plot of nylon-GaN core-shell nanofiber mat, and (b) storage modulus vs. temperature plots of pristine nylon 6,6 and nylon-GaN core-shell nanofiber mats.
